# Supplementary material for: Synergistic integration of ADSCs and egg white hydrogel microspheres for accelerated wound regeneration
Source: Royal Society of Chemistry journal article supplement (doi:10.1039/d5tb00007f), 2025-01-01
Supplement: d5tb00007f1.pdf [file d5tb00007f1.pdf]

### Supporting Information

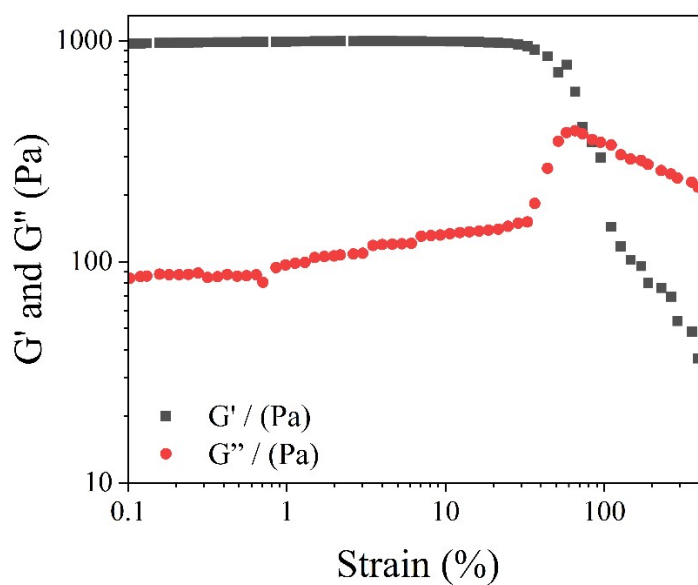

Figure S1. Strain amplitude sweep test of the EWH.

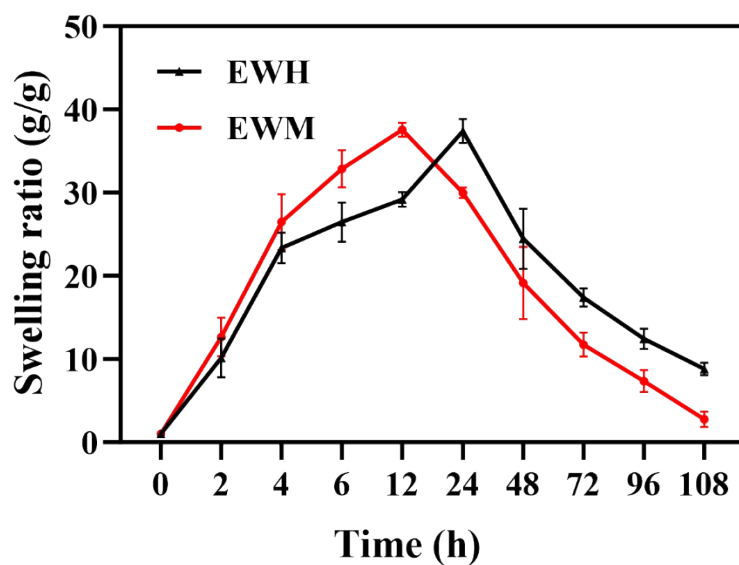

Figure S2. Swelling rate of the EWH and EWM.

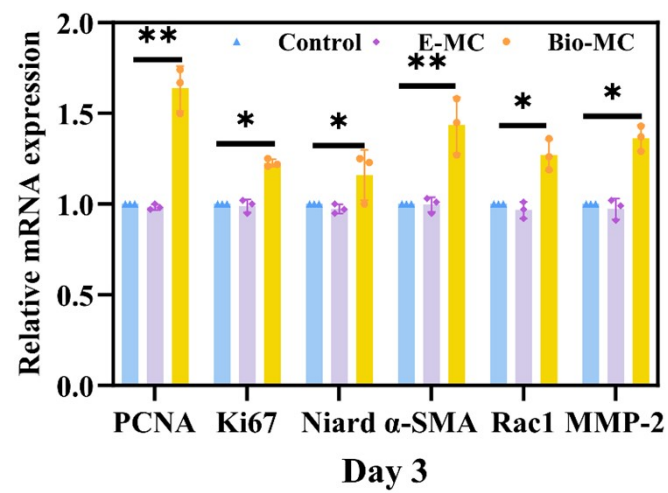

Figure S3. qRT-PCR analysis showing the transcription level of several corresponding genes on Day 3.

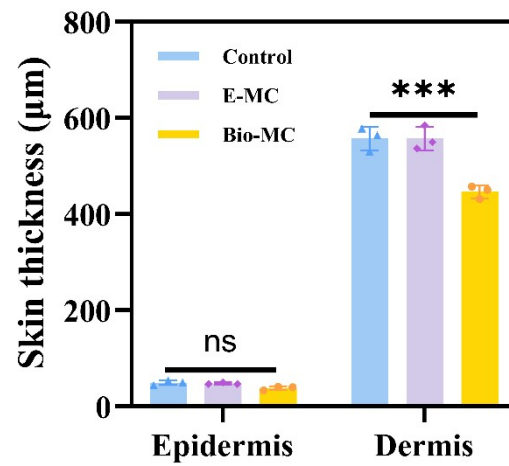

Figure S4. The quantitative analysis of epidermis and dermis.

Table S1. Preparation details of EWH, EWM (E-MC), and Bio-MC

| Classification | Preparation details                                                                                    |
|----------------|--------------------------------------------------------------------------------------------------------|
| EWH            | Egg white/ NaOH solution/ / DMEM                                                                       |
| E-MC           | Egg white/ NaOH solution/ Dimethylsilicone oil/ CaCl <sub>2</sub> (5%w/v)<br>/ Tween 20 (1%v/v)        |
| Bio-MC         | Egg white/ NaOH solution/ Dimethylsilicone oil/ CaCl <sub>2</sub> (5%w/v)<br>/ Tween 20 (1%v/v)/ ADSCs |
